# Supplementary material for: Adaptive immune responses to booster vaccination against yellow fever virus are much reduced compared to those after primary vaccination
Source: PubMed Central journal article supplement (PMC5429613; doi:10.1038/s41598-017-00798-1), 2017-04-06

## **Adaptive immune responses to booster vaccination against yellow fever virus are much reduced compared to those after primary vaccination**

Michael Kongsgaard<sup>1</sup>, Maria R. Bassi<sup>1</sup>, Michael Rasmussen<sup>1</sup>, Karsten Skjødt<sup>2</sup>, Søren Thybo<sup>3</sup>, Mette Gabriel<sup>4</sup>, Morten Bagge Hansen<sup>5</sup>, Jan Pravsgaard Christensen<sup>1</sup>, Allan Randrup Thomsen<sup>1</sup>, Soren Buus<sup>1\*</sup> and Anette Stryhn<sup>1\*</sup>.

<sup>1</sup> Department of Immunology and Microbiology, University of Copenhagen, Copenhagen, Denmark.

<sup>2</sup> Department of Cancer and Inflammation, Institute for Molecular Medicine, University of Southern Denmark, Odense, Denmark.

<sup>3</sup> Department of Infectious Diseases, Copenhagen University Hospital, Copenhagen, Denmark

<sup>4</sup> Medical Office, Copenhagen, Denmark

<sup>5</sup> Department of Clinical Immunology, Copenhagen University Hospital, Copenhagen, Denmark

## Supplementary figures

### **Supplementary figure S1: Comparison of HLA-DR<sup>+</sup>/CD38<sup>+</sup> and Ki67<sup>+</sup>/Bcl2<sup>-</sup> detection of activated CD8<sup>+</sup> T cells after YF-17D vaccination.**

PBMCs from 190 primary YFV vaccinated donors were extracellular and intracellular stained with fluorochrome-conjugated antibodies specific for CD3, CD8, CD38, and HLA-DR or CD3, CD8, Ki67, and Bcl2, respectively. For each donor the frequency of CD38<sup>+</sup> HLA-DR<sup>+</sup> CD8<sup>+</sup> T cells are plotted against the frequency of Ki67<sup>+</sup> Bcl2<sup>-</sup> CD8<sup>+</sup> T cells, respectively. The line indicates  $y = x$ .

### **Supplementary figure S2: A representative flow cytometric analysis of T cell activation.**

PBMCs from a primary vaccinated donor obtained before (pre) and after (post) YF-17D vaccination were stained *ex vivo* with CD3, CD8, CD4, CD38 and HLA-DR specific antibodies. The two left-hand panels show CD8<sup>+</sup> T cells obtained before and after YF-17D vaccination. The population gated in red represents the activated CD38<sup>+</sup> HLA-DR<sup>+</sup> CD8<sup>+</sup> CD3<sup>+</sup> T cells. The two right-hand panels show CD4<sup>+</sup> T cells obtained before and after YF-17D vaccination. The population gated in green represents the activated CD38<sup>+</sup> HLA-DR<sup>+</sup> CD4<sup>+</sup> CD3<sup>+</sup> T cells.

### **Supplementary figure S3: A representative HLA-A02:01/NS4B<sub>214-222</sub> tetramer-based analysis of specific CD8<sup>+</sup> T cells before and after YF-17D vaccination.**

PBMCs from a HLA-A\*02:01 positive donor obtained before (pre) and after (after) primary YF-17D vaccination were stained *ex vivo* with a NS4B<sub>214-222</sub>/HLA-A\*02:01 tetramer, and with anti-CD3 and -CD8 specific antibodies. The percentage of tetramer<sup>+</sup>, CD8<sup>+</sup> T cells is indicated. The specificity of the tetramer staining is indicated by the increased staining after vaccination as well as the lacking binding to irrelevant cells such as the CD8<sup>-</sup> (i.e. CD4<sup>+</sup>) T cells.

### **Supplementary figure S4: Representative staining of specific CD8<sup>+</sup> T cells using 11 additional tetramers.**

PBMCs from HLA class I-typed primary vaccinated donors were obtained after YF-17D vaccination and stained *ex vivo* with the indicated tetramers, and with anti-CD3 and -CD8 specific antibodies. Staining of a well-defined population of CD8<sup>+</sup> T cells, but not of CD4<sup>+</sup> T cells, illustrates the specificity of the tetramers. In contrast, the tetramer background staining is a dispersed staining of <0.009%.

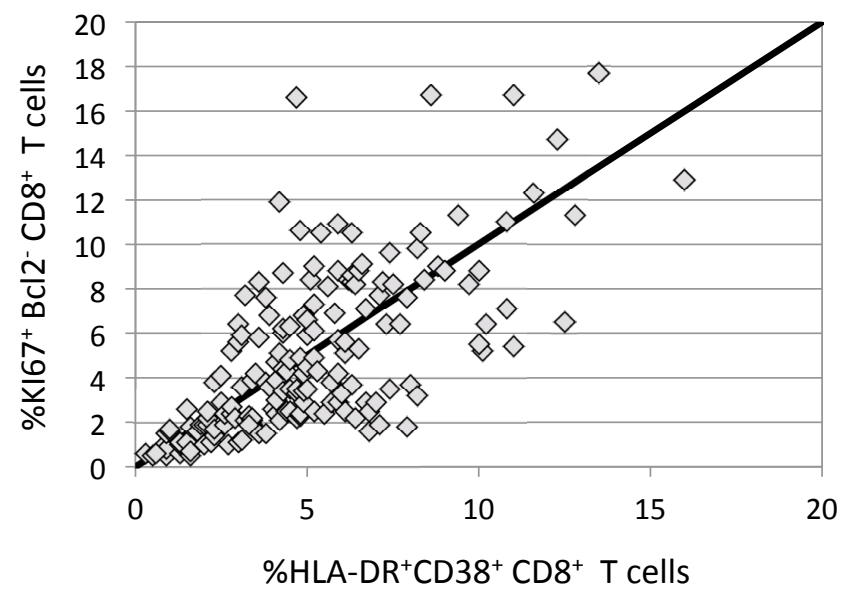

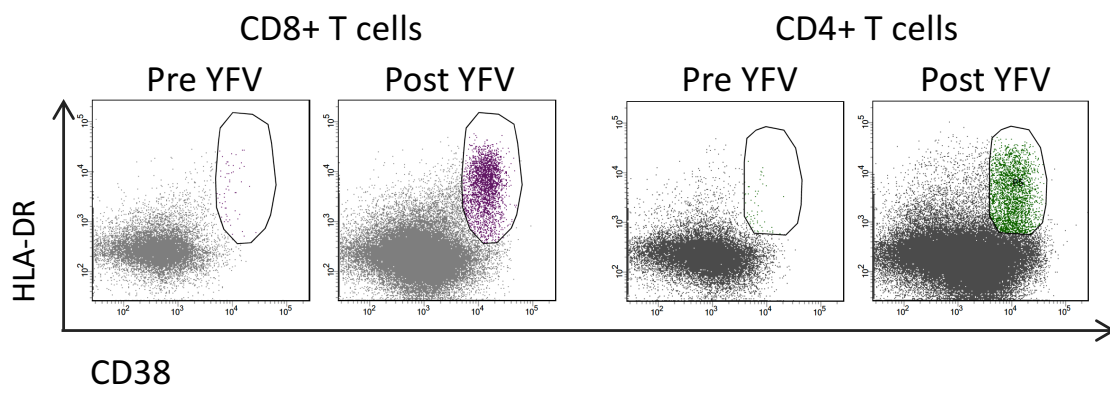

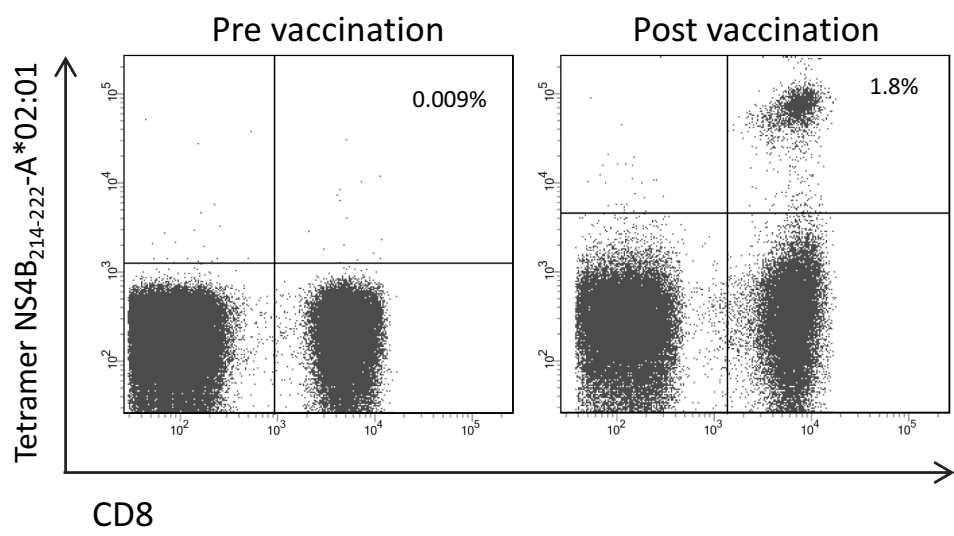

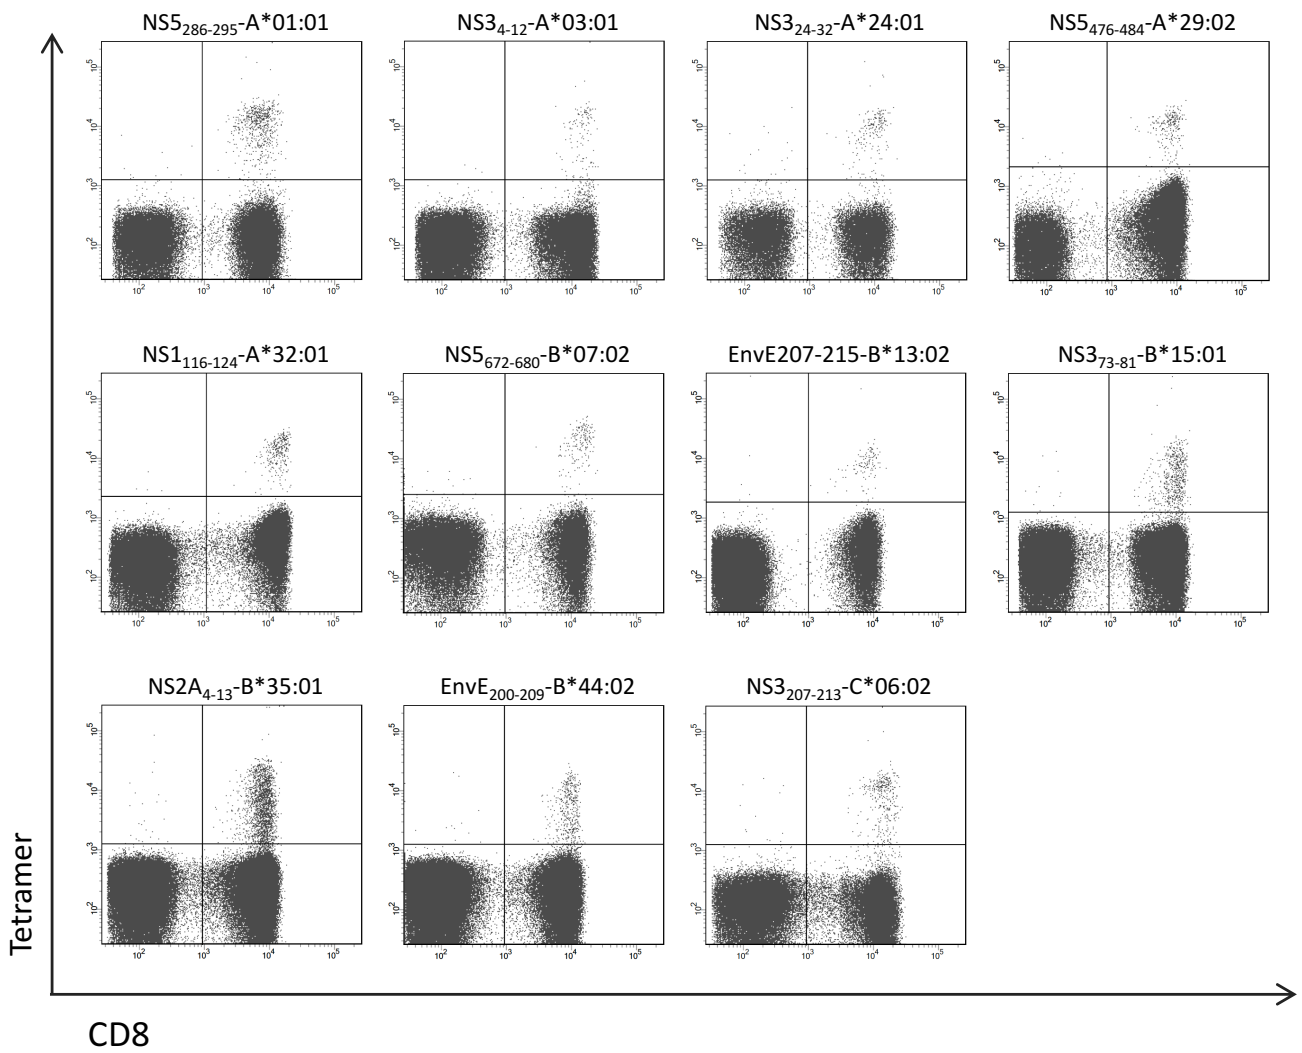

Supplement: 41598_2017_798_MOESM1_ESM.pdf [file 41598_2017_798_MOESM1_ESM.pdf]
